# Supplementary material for: Calliviminones C–H: six new hetero- and carbon-Diels–Alder adducts with unusual skeletons from the fruits of Callistemon viminalis
Source: Royal Society of Chemistry journal article supplement (doi:10.1039/c5ra19651e), 2015-01-01
Supplement: c5ra19651e1.pdf [file c5ra19651e1.pdf]

**Calliviminones C-H: Six New Hetero- and Carbon-Diels-Alder  
Adducts with Unusual Skeletons from the Fruits of *Callistemon  
viminalis***

Lin Wu, Jun Luo, Xiao-bing Wang, Rui-jun Li, Ya-long Zhang and Ling-Yi Kong\*

*State Key Laboratory of Natural Medicines, Department of Natural Medicinal Chemistry, China Pharmaceutical  
University, 24 Tong Jia Xiang, Nanjing 210009, People's Republic of China*

## The list of supplementary content

|                                                                                        |    |
|----------------------------------------------------------------------------------------|----|
| Figure S1.1 $^1\text{H}$ NMR spectrum of compound <b>1</b> in $\text{CDCl}_3$ .....    | 4  |
| Figure S1.2 $^{13}\text{C}$ NMR spectrum of compound <b>1</b> in $\text{CDCl}_3$ ..... | 4  |
| Figure S1.3 HSQC spectrum of compound <b>1</b> in $\text{CDCl}_3$ .....                | 5  |
| Figure S1.4 HMBC spectrum of compound <b>1</b> in $\text{CDCl}_3$ .....                | 5  |
| Figure S1.5 ROESY spectrum of compound <b>1</b> in $\text{CDCl}_3$ .....               | 6  |
| Figure S1.6 HRESIMS spectrum of compound <b>1</b> .....                                | 6  |
| Figure S2.1 $^1\text{H}$ NMR spectrum of compound <b>2</b> in $\text{CDCl}_3$ .....    | 7  |
| Figure S2.2 $^{13}\text{C}$ NMR spectrum of compound <b>2</b> in $\text{CDCl}_3$ ..... | 7  |
| Figure S2.3 HSQC spectrum of compound <b>2</b> in $\text{CDCl}_3$ .....                | 8  |
| Figure S2.4 HMBC spectrum of compound <b>2</b> in $\text{CDCl}_3$ .....                | 8  |
| Figure S2.5 ROESY spectrum of compound <b>2</b> in $\text{CDCl}_3$ .....               | 9  |
| Figure S2.6 HRESIMS spectrum of compound <b>2</b> .....                                | 9  |
| Figure S3.1 $^1\text{H}$ NMR spectrum of compound <b>3</b> in $\text{CDCl}_3$ .....    | 10 |
| Figure S3.2 $^{13}\text{C}$ NMR spectrum of compound <b>3</b> in $\text{CDCl}_3$ ..... | 10 |
| Figure S3.3 HSQC spectrum of compound <b>3</b> in $\text{CDCl}_3$ .....                | 11 |
| Figure S3.4 HMBC spectrum of compound <b>3</b> in $\text{CDCl}_3$ .....                | 11 |
| Figure S3.5 ROESY spectrum of compound <b>3</b> in $\text{CDCl}_3$ .....               | 12 |
| Figure S3.6 HRESIMS spectrum of compound <b>3</b> .....                                | 12 |
| Figure S4.1 $^1\text{H}$ NMR spectrum of compound <b>4</b> in $\text{CDCl}_3$ .....    | 13 |
| Figure S4.2 $^{13}\text{C}$ NMR spectrum of compound <b>4</b> in $\text{CDCl}_3$ ..... | 13 |
| Figure S4.3 HSQC spectrum of compound <b>4</b> in $\text{CDCl}_3$ .....                | 14 |

|                                                                                          |    |
|------------------------------------------------------------------------------------------|----|
| Figure S4.4 HMBC spectrum of compound <b>4</b> in CDCl <sub>3</sub> .....                | 14 |
| Figure S4.5 ROESY spectrum of compound <b>4</b> in CDCl <sub>3</sub> .....               | 15 |
| Figure S4.6 HRESIMS spectrum of compound <b>4</b> .....                                  | 15 |
| Figure S5.1 <sup>1</sup> H NMR spectrum of compound <b>5</b> in CDCl <sub>3</sub> .....  | 16 |
| Figure S5.2 <sup>13</sup> C NMR spectrum of compound <b>5</b> in CDCl <sub>3</sub> ..... | 16 |
| Figure S5.3 HSQC spectrum of compound <b>5</b> in CDCl <sub>3</sub> .....                | 17 |
| Figure S5.4 HMBC spectrum of compound <b>5</b> in CDCl <sub>3</sub> .....                | 17 |
| Figure S5.5 ROESY spectrum of compound <b>5</b> in CDCl <sub>3</sub> .....               | 18 |
| Figure S5.6 HRESIMS spectrum of compound <b>5</b> .....                                  | 18 |
| Figure S5.7 CD spectrum of compound <b>5</b> .....                                       | 19 |
| Figure S6.1 <sup>1</sup> H NMR spectrum of compound <b>6</b> in CDCl <sub>3</sub> .....  | 19 |
| Figure S6.2 <sup>13</sup> C NMR spectrum of compound <b>6</b> in CDCl <sub>3</sub> ..... | 20 |
| Figure S6.3 HSQC spectrum of compound <b>6</b> in CDCl <sub>3</sub> .....                | 20 |
| Figure S6.4 HMBC spectrum of compound <b>6</b> in CDCl <sub>3</sub> .....                | 21 |
| Figure S6.5 ROESY spectrum of compound <b>6</b> in CDCl <sub>3</sub> .....               | 21 |
| Figure S6.6 HRESIMS spectrum of compound <b>6</b> .....                                  | 22 |
| Figure S6.7 CD spectrum of compound <b>6</b> .....                                       | 22 |

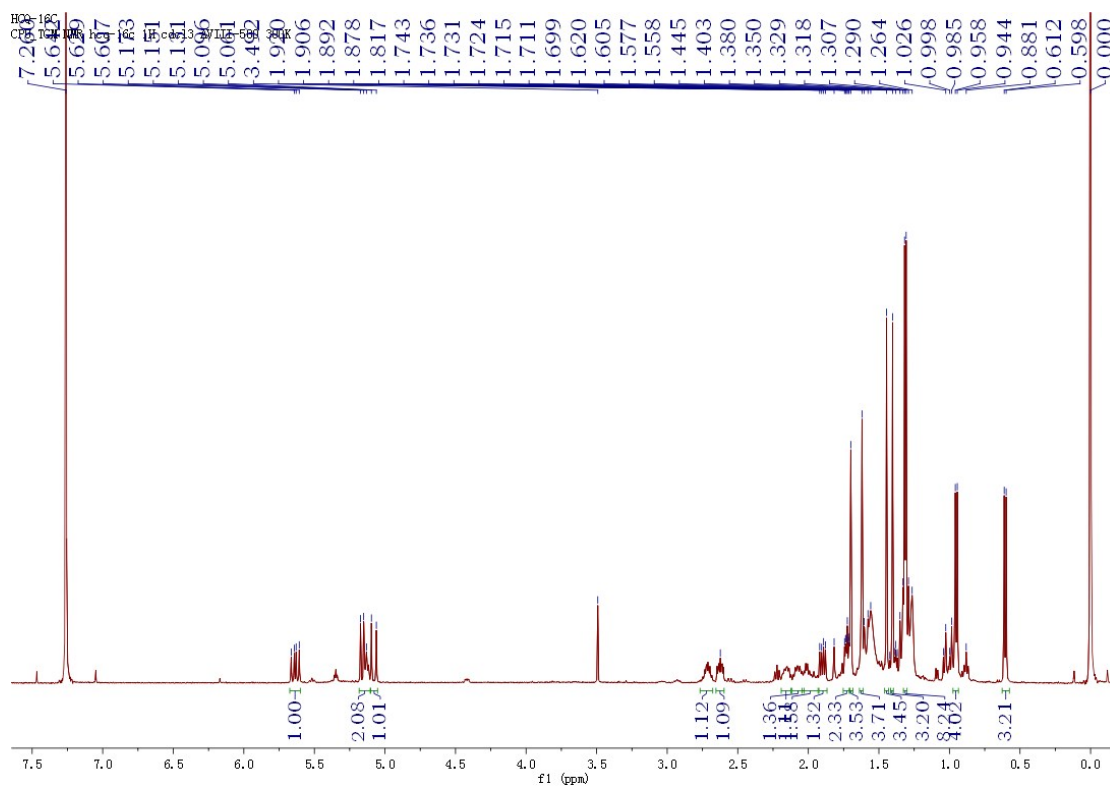

Figure S1.1  $^1\text{H}$  NMR spectrum of compound **1** in  $\text{CDCl}_3$

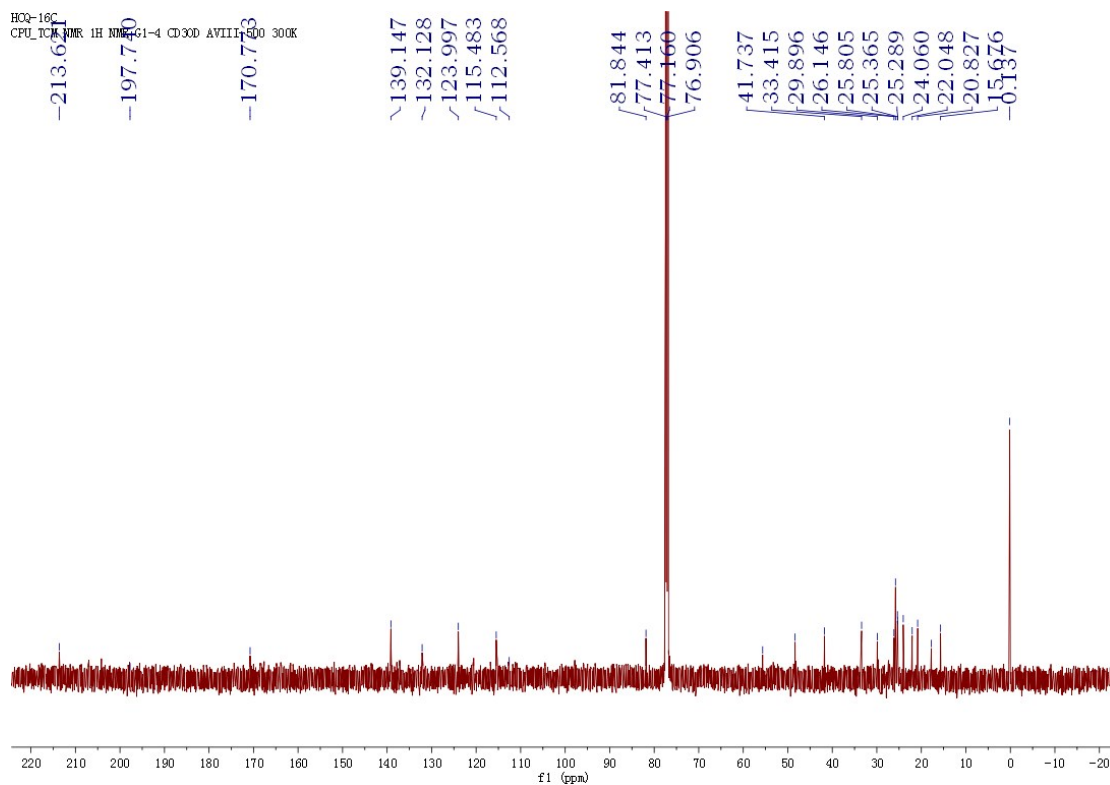

Figure S1.2  $^{13}\text{C}$  NMR spectrum of compound **1** in  $\text{CDCl}_3$

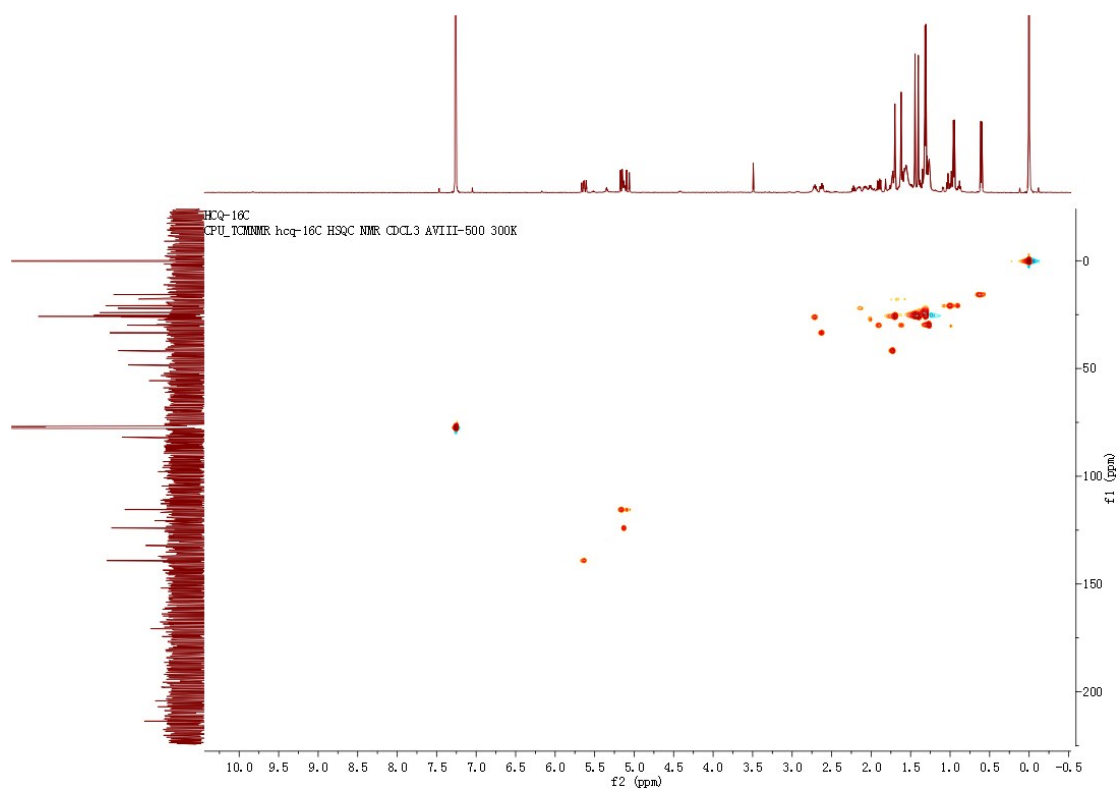

Figure S1.3 HSQC spectrum of compound **1** in CDCl<sub>3</sub>

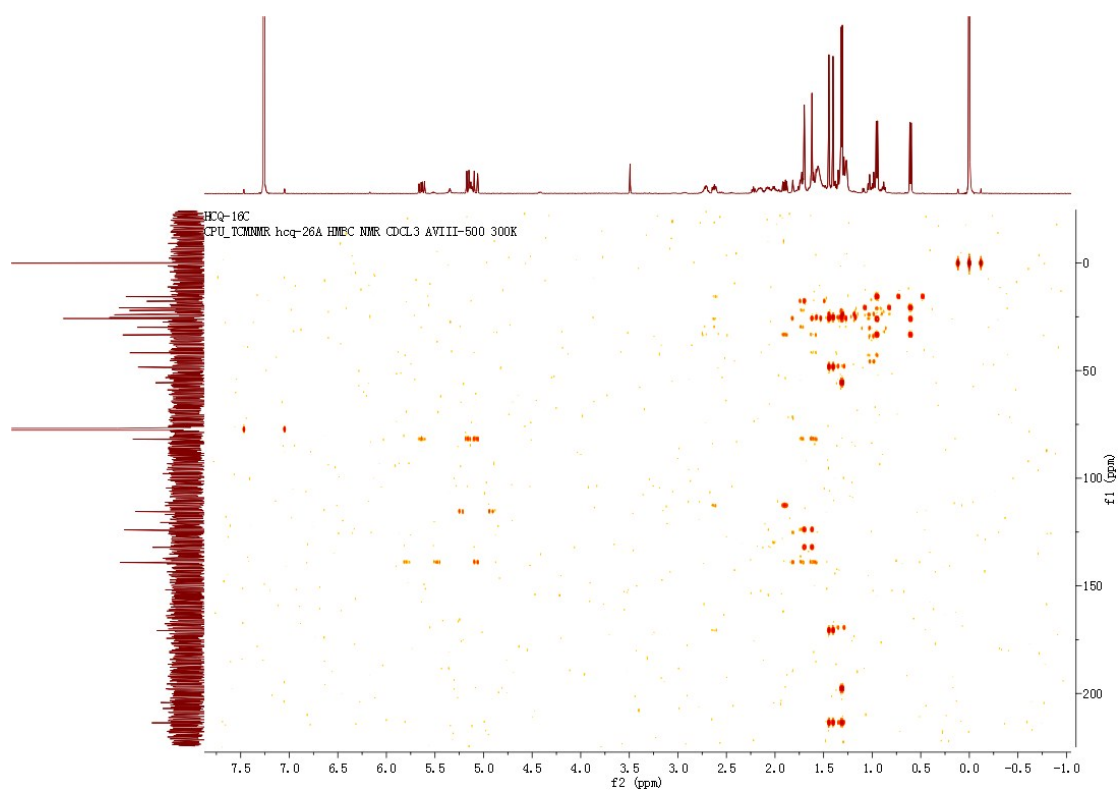

Figure S1.4 HMBC spectrum of compound **1** in CDCl<sub>3</sub>

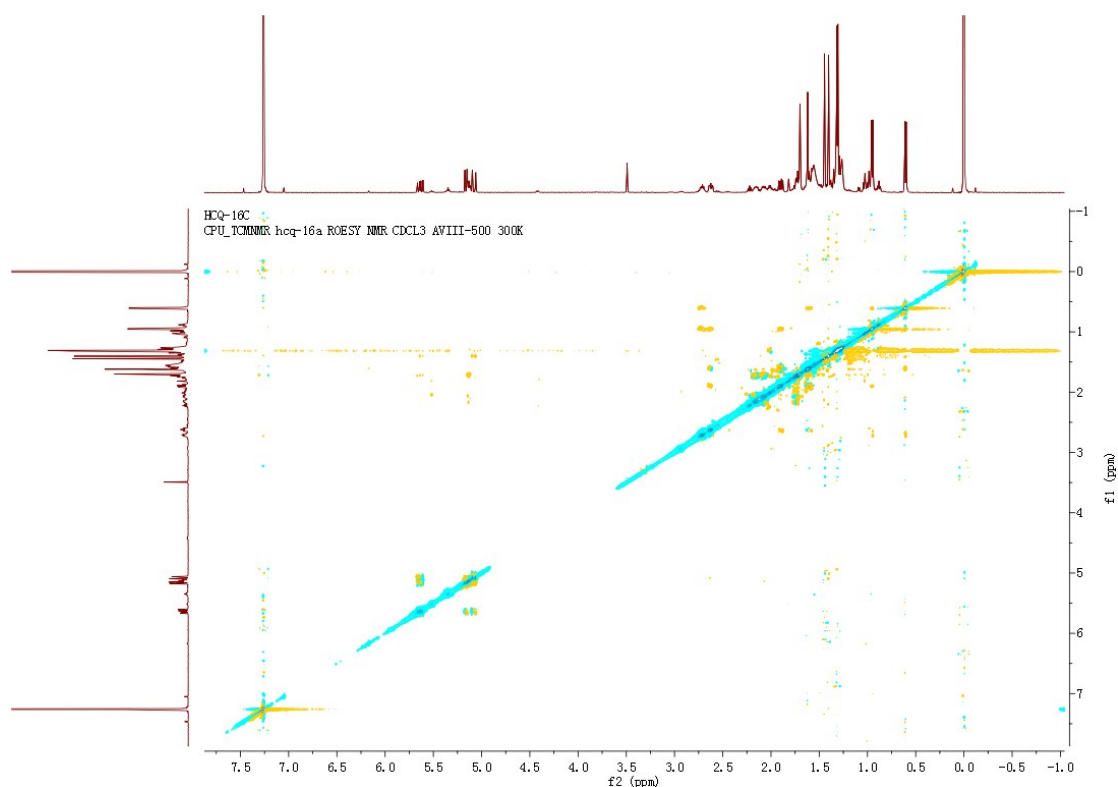

Figure S1.5 ROESY spectrum of compound **1** in CDCl<sub>3</sub>

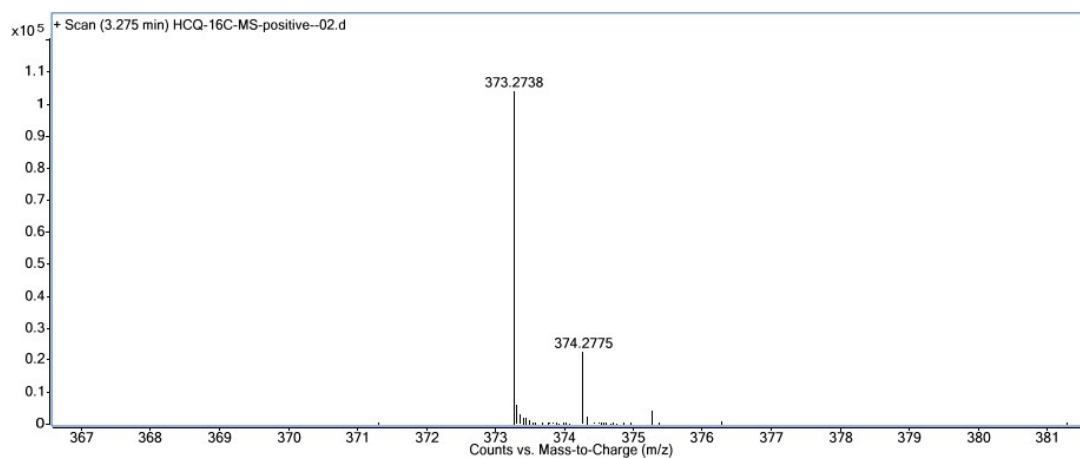

#### Elemental Composition Calculator

|                                                |                                                  |                     |                  |                 |                    |
|------------------------------------------------|--------------------------------------------------|---------------------|------------------|-----------------|--------------------|
| <b>Target m/z:</b>                             | 373.2738                                         | <b>Result type:</b> | Positive ions    | <b>Species:</b> | [M+H] <sup>+</sup> |
| <b>Elements:</b>                               | C (0-80); H (0-120); O (0-30); N(0-10); Na (0-5) |                     |                  |                 |                    |
| <b>Ion Formula</b>                             | <b>Calculated m/z</b>                            |                     | <b>PPM Error</b> |                 |                    |
| C <sub>24</sub> H <sub>37</sub> O <sub>3</sub> | 373.2737                                         |                     | -0.21            |                 |                    |

Figure S1.6 HRESIMS spectrum of compound **1**

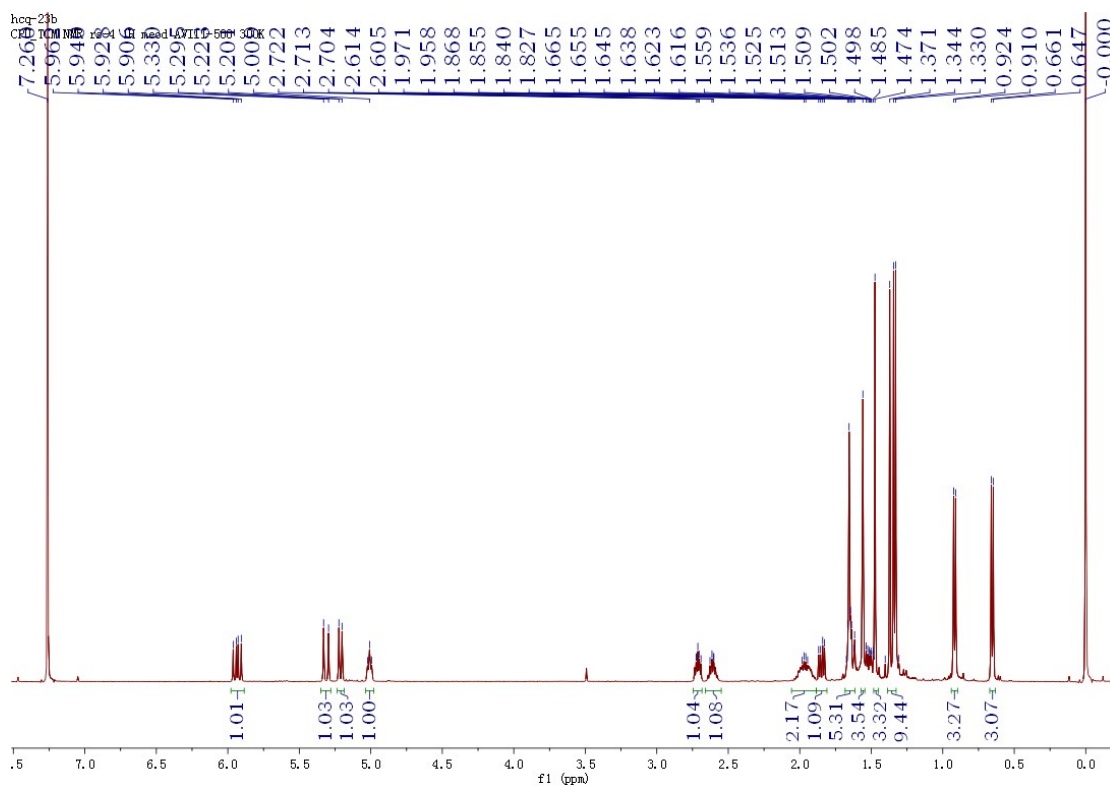

Figure S2.1  $^1\text{H}$  NMR spectrum of compound **2** in  $\text{CDCl}_3$

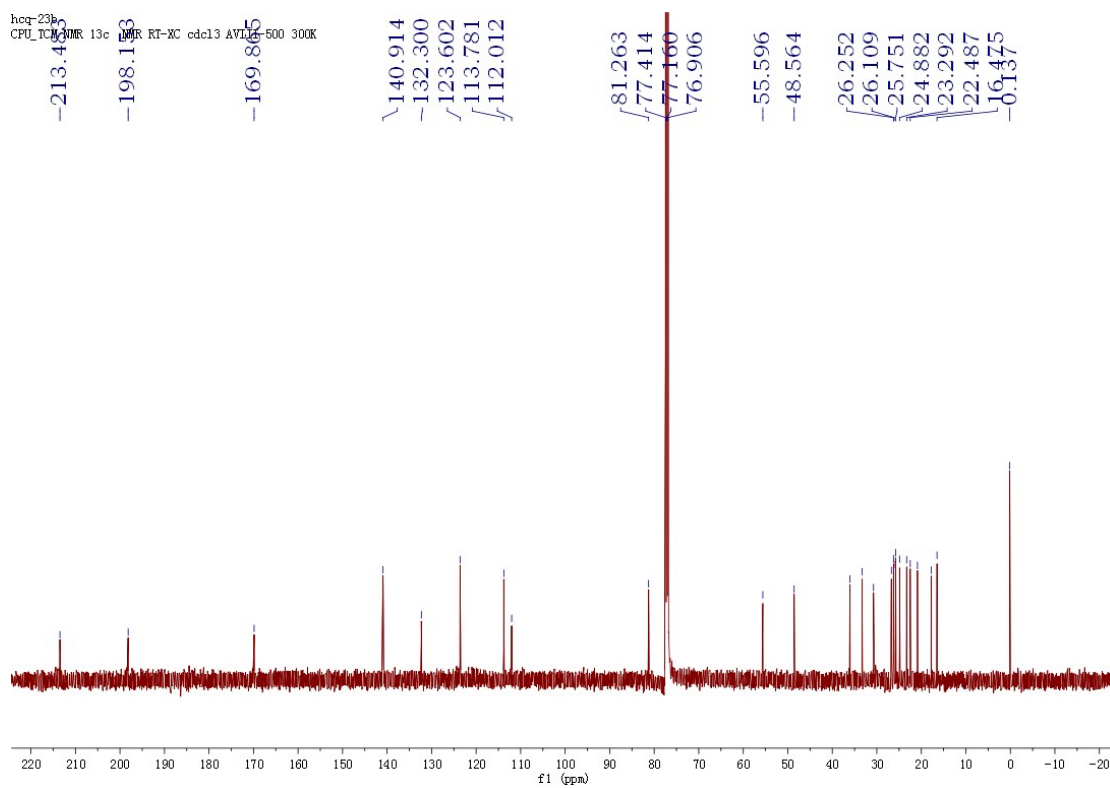

Figure S2.2  $^{13}\text{C}$  NMR spectrum of compound **2** in  $\text{CDCl}_3$

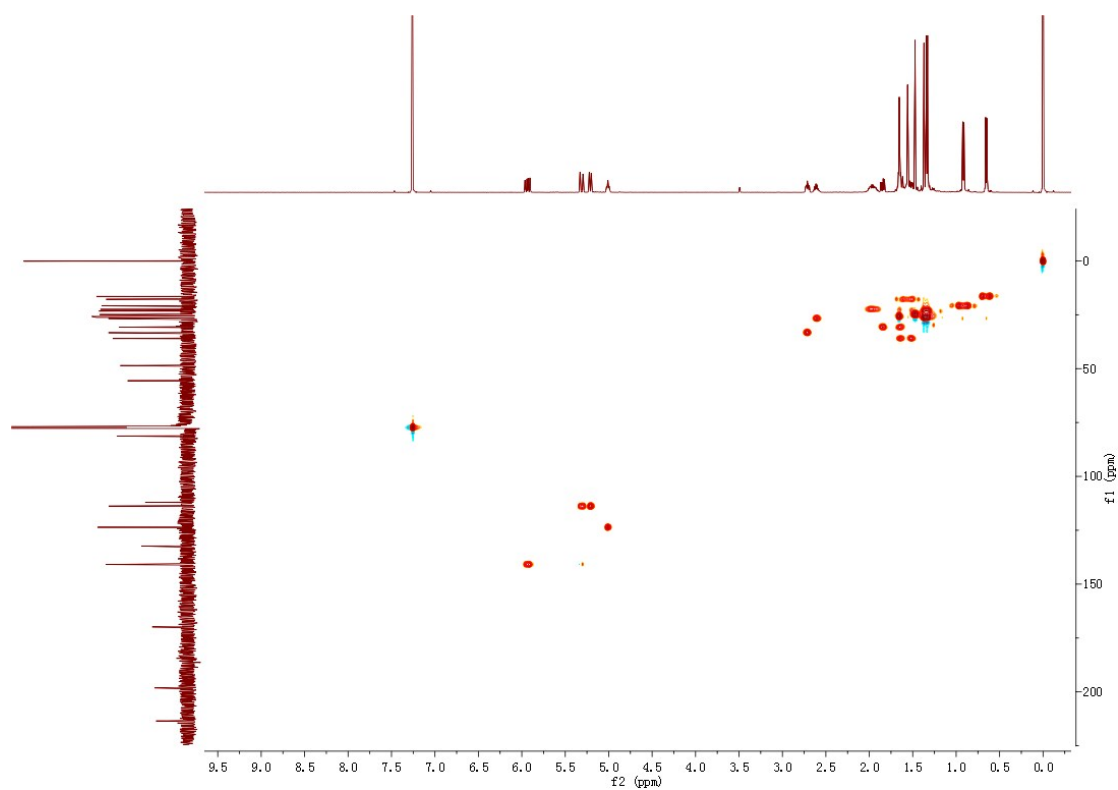

Figure S2.3 HSQC spectrum of compound **2** in  $\text{CDCl}_3$

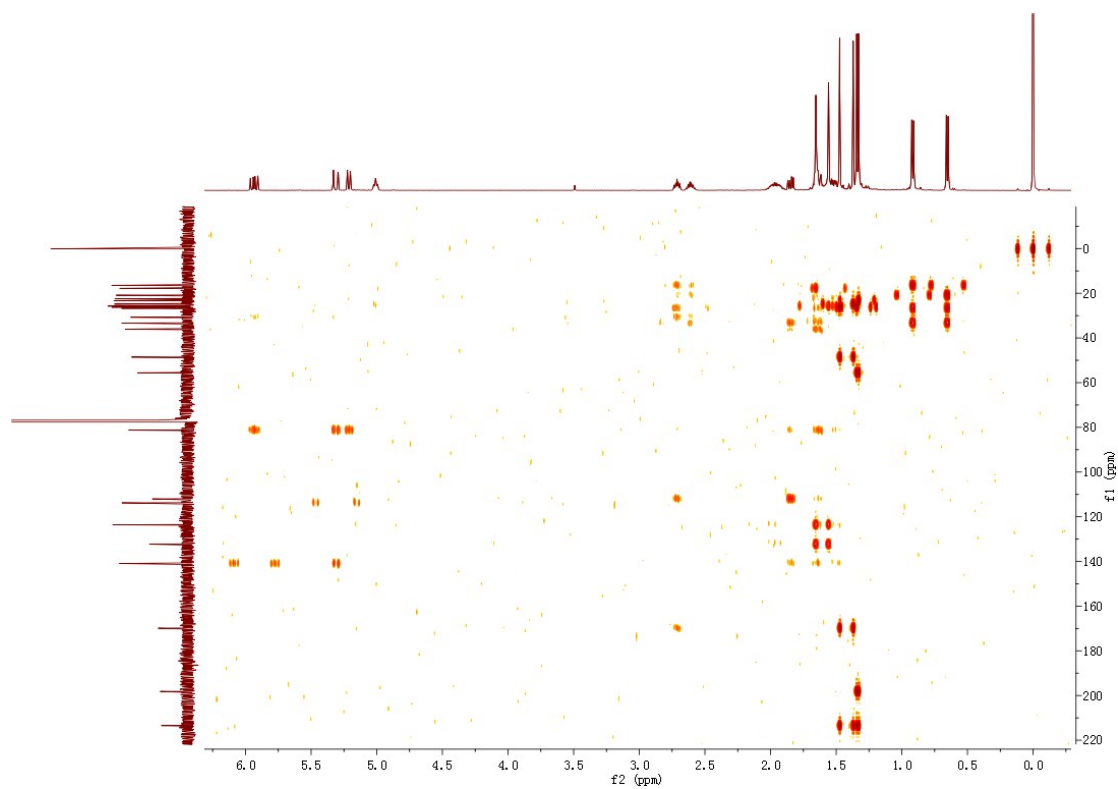

Figure S2.4 HMBC spectrum of compound **2** in  $\text{CDCl}_3$



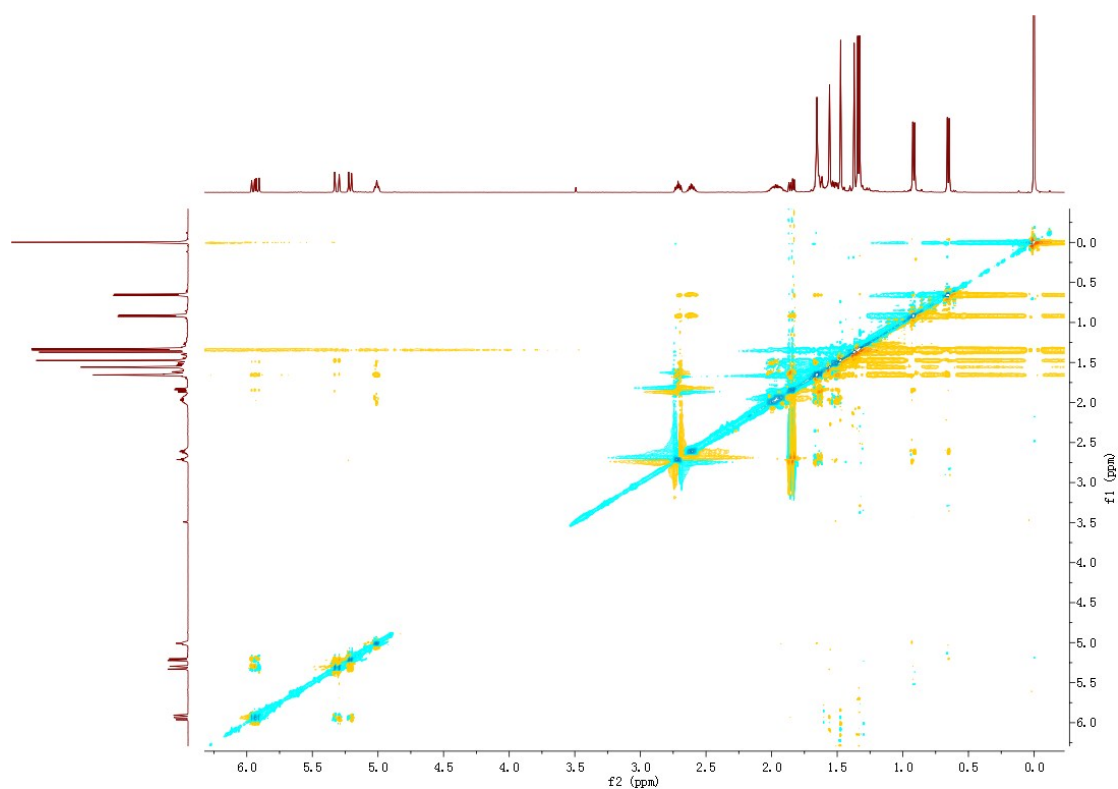

Figure S2.5 ROESY spectrum of compound **2** in CDCl<sub>3</sub>

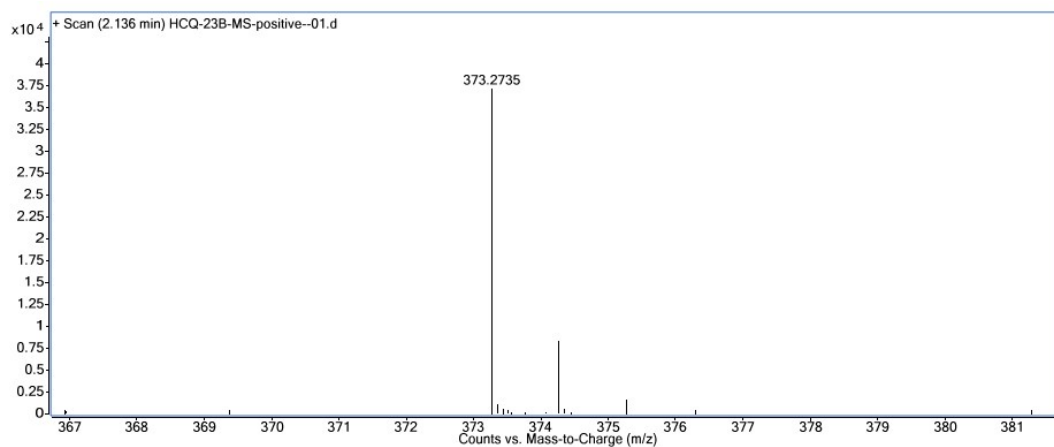

#### Elemental Composition Calculator

|                                                |                                                  |                     |                  |                 |                    |
|------------------------------------------------|--------------------------------------------------|---------------------|------------------|-----------------|--------------------|
| <b>Target m/z:</b>                             | 373.2735                                         | <b>Result type:</b> | Positive ions    | <b>Species:</b> | [M+H] <sup>+</sup> |
| <b>Elements:</b>                               | C (0-80); H (0-120); O (0-30); N(0-10); Na (0-5) |                     |                  |                 |                    |
| <b>Ion Formula</b>                             | <b>Calculated m/z</b>                            |                     | <b>PPM Error</b> |                 |                    |
| C <sub>24</sub> H <sub>37</sub> O <sub>3</sub> | 373.2737                                         |                     | 0.61             |                 |                    |

Figure S2.6 HRESIMS spectrum of compound **2**

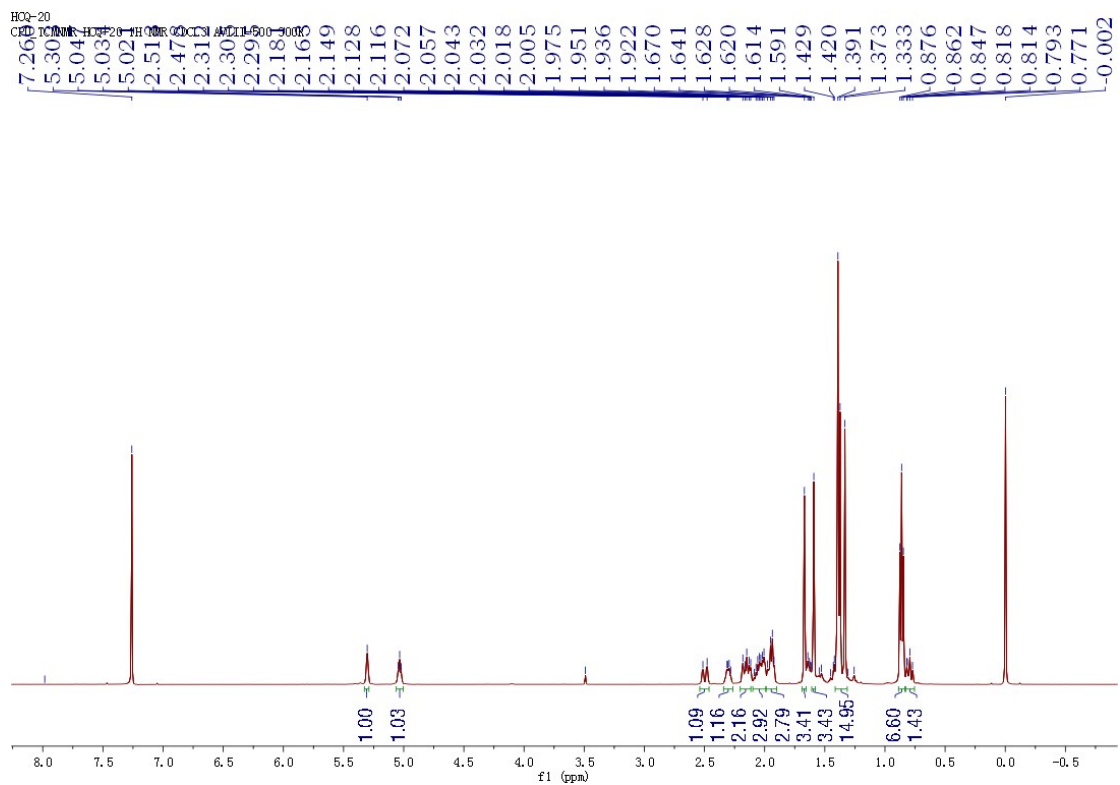

Figure S3.1 <sup>1</sup>H NMR spectrum of compound **3** in CDCl<sub>3</sub>

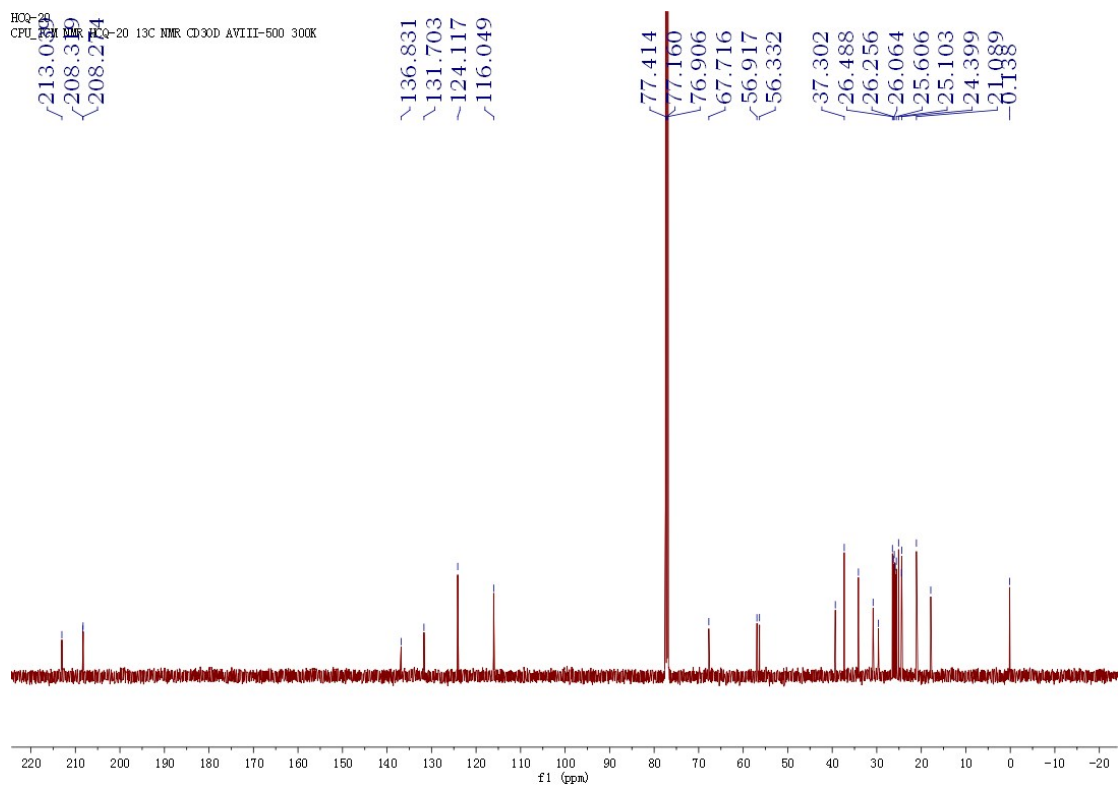

Figure S3.2 <sup>13</sup>C NMR spectrum of compound **3** in CDCl<sub>3</sub>

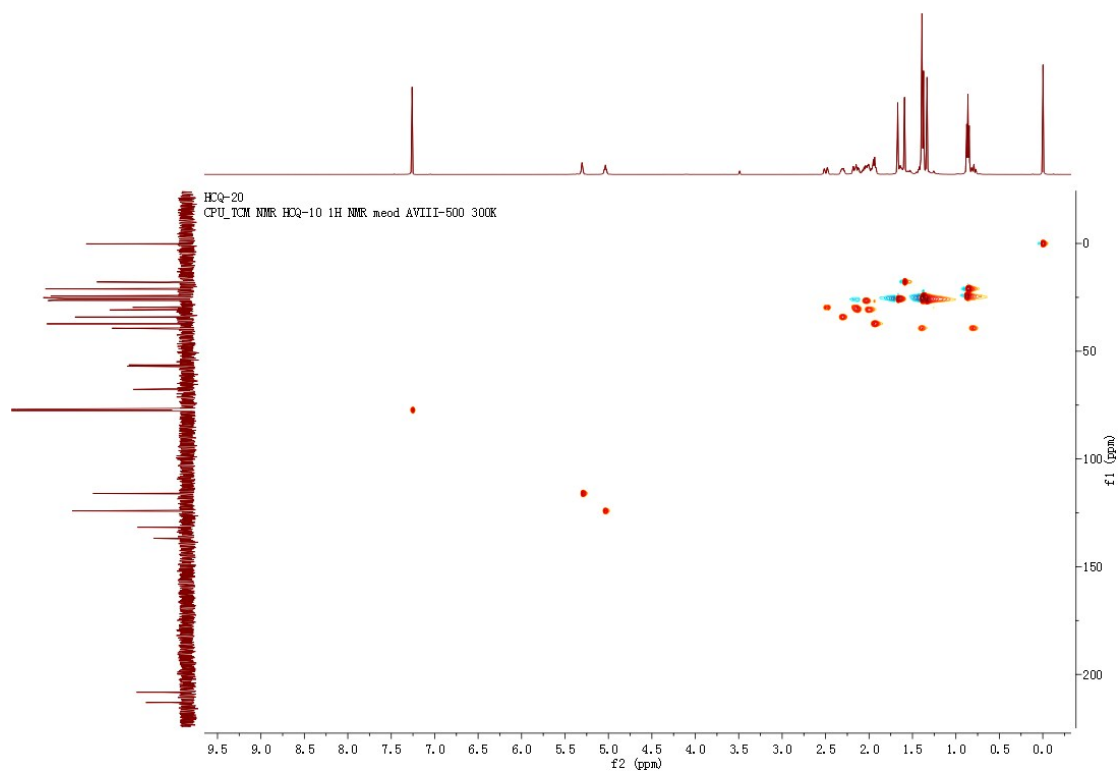

Figure S3.3 HSQC spectrum of compound **3** in  $\text{CDCl}_3$

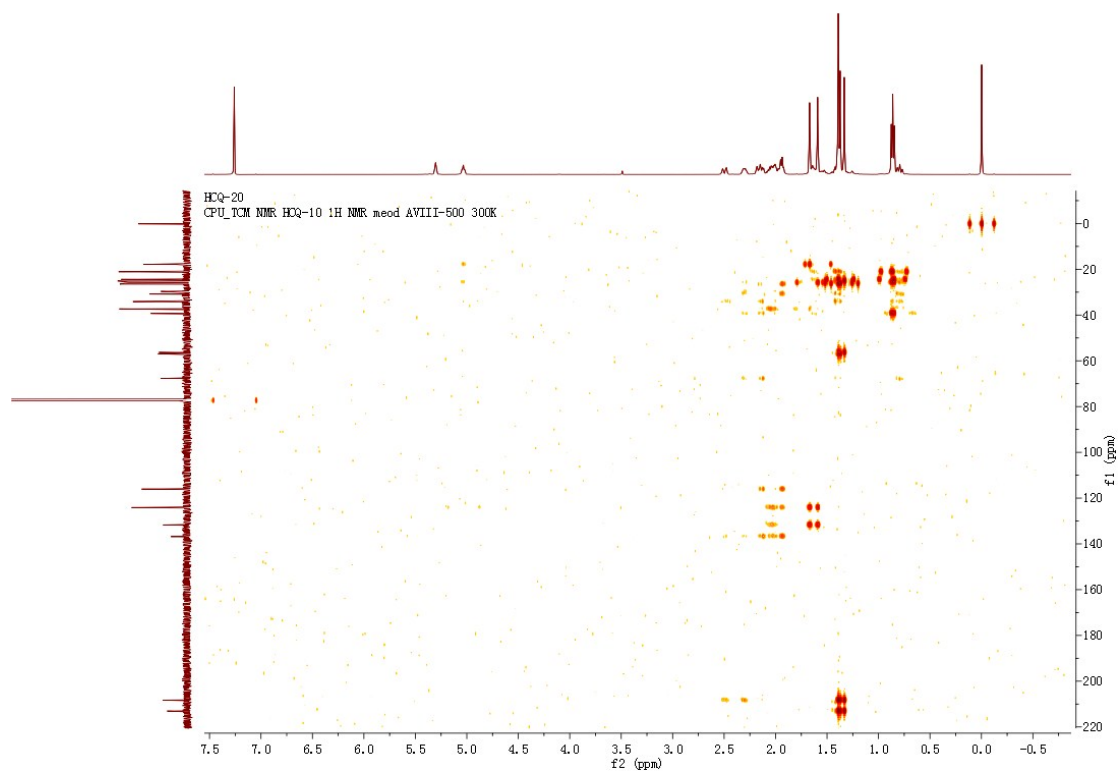

Figure S3.4 HMBC spectrum of compound **3** in  $\text{CDCl}_3$

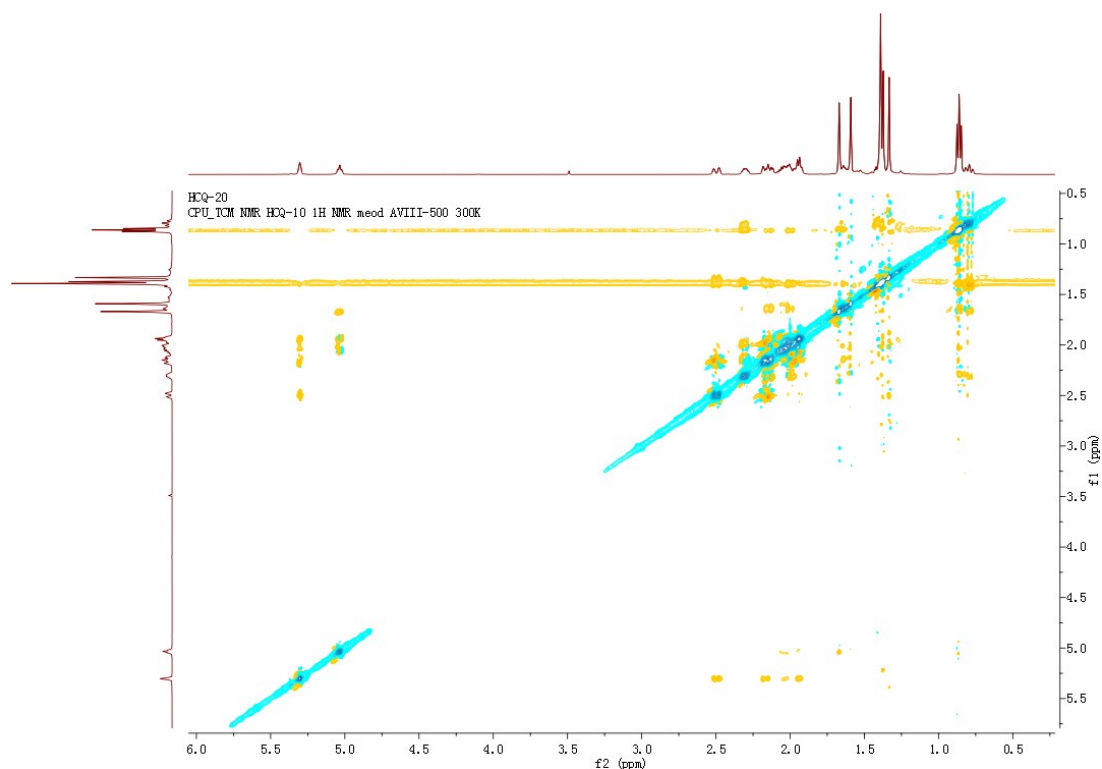

Figure S3.5 ROESY spectrum of compound **3** in  $\text{CDCl}_3$

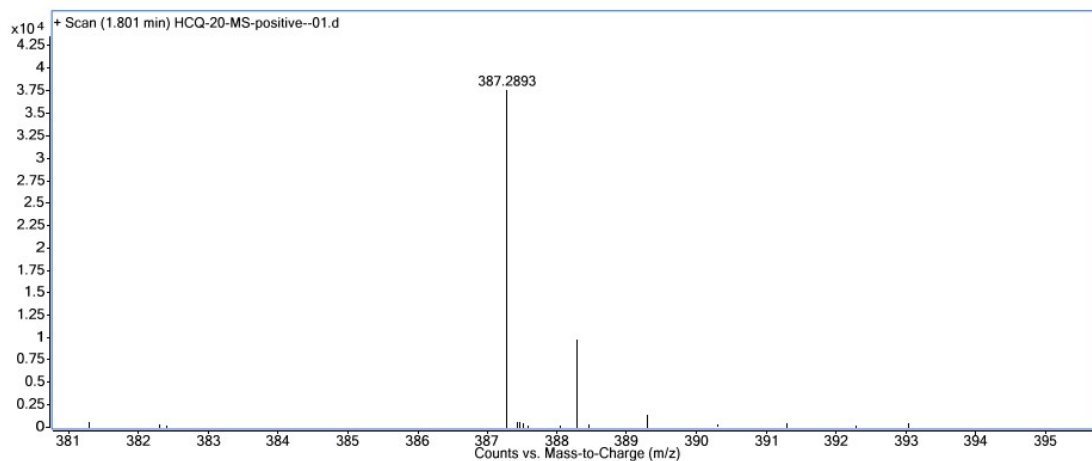

#### Elemental Composition Calculator

| Target m/z:                            | 387.2893                                         | Result type: | Positive ions | Species: | $[\text{M}+\text{H}]^+$ |
|----------------------------------------|--------------------------------------------------|--------------|---------------|----------|-------------------------|
| Elements:                              | C (0-80); H (0-120); O (0-30); N(0-10); Na (0-5) |              |               |          |                         |
| Ion Formula                            | Calculated m/z                                   |              | PPM Error     |          |                         |
| $\text{C}_{25}\text{H}_{39}\text{O}_3$ | 387.2894                                         |              | 0.11          |          |                         |

Figure S3.6 HRESIMS spectrum of compound **3**

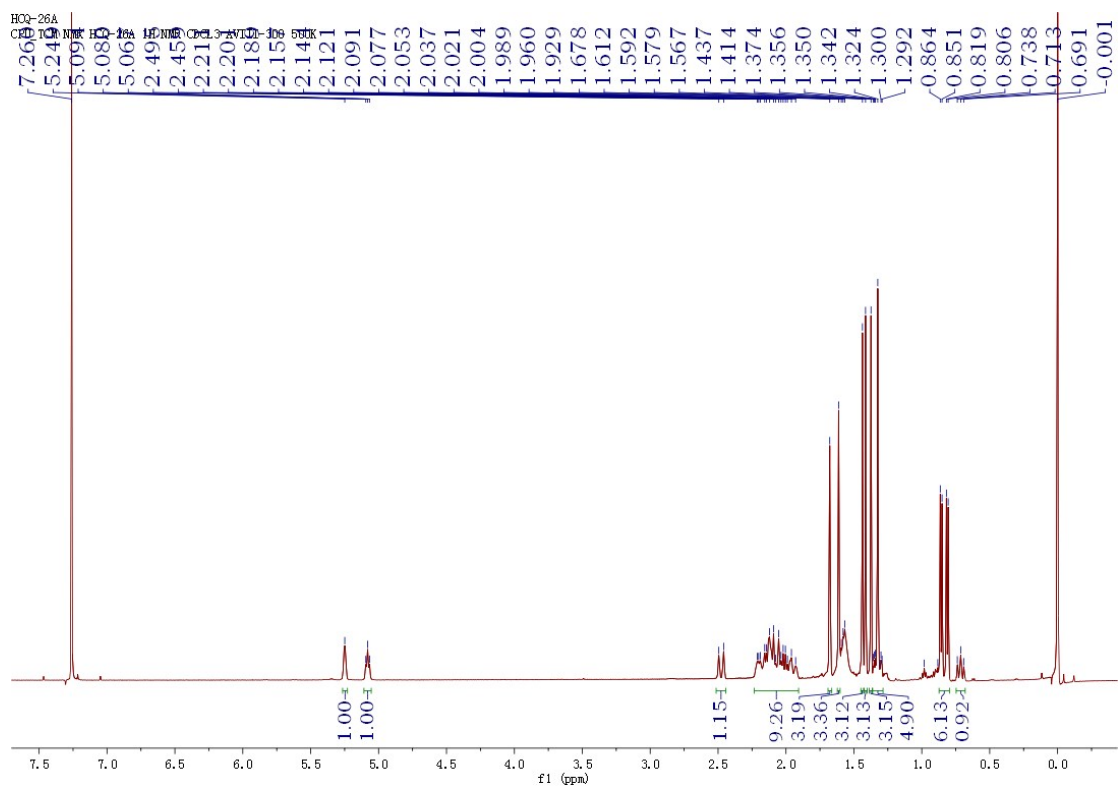

Figure S4.1 <sup>1</sup>H NMR spectrum of compound **4** in CDCl<sub>3</sub>

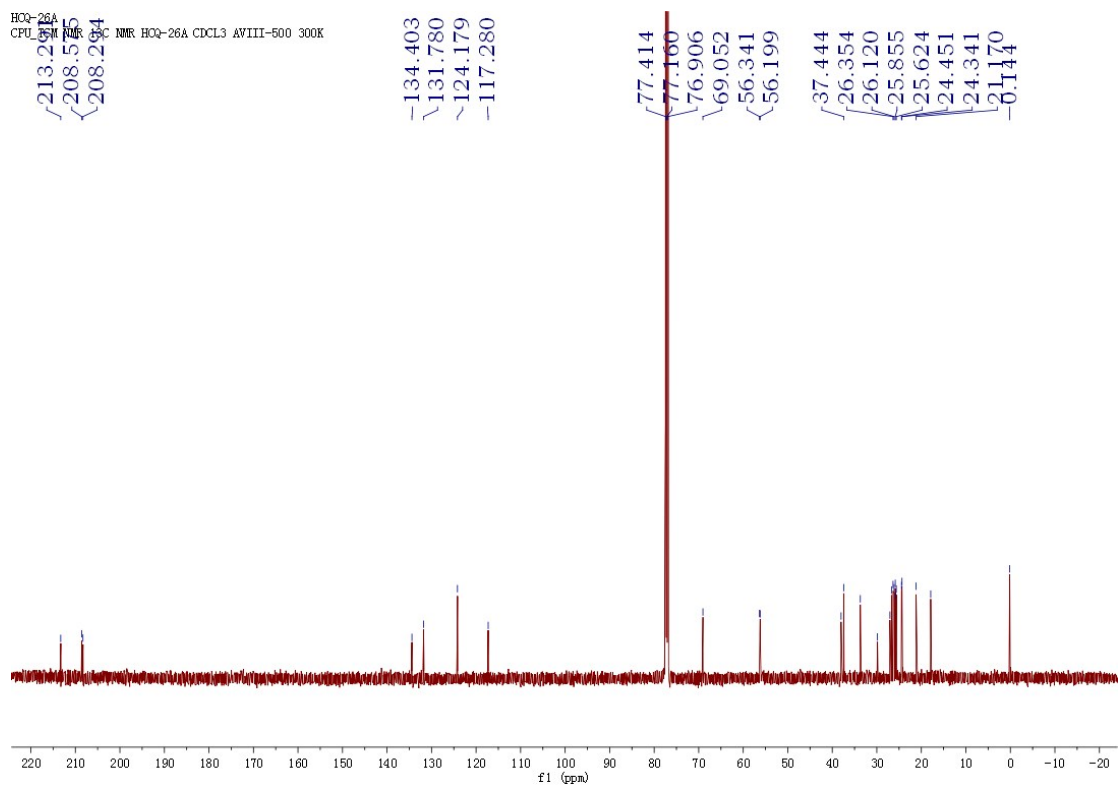

Figure S4.2 <sup>13</sup>C NMR spectrum of compound **4** in CDCl<sub>3</sub>

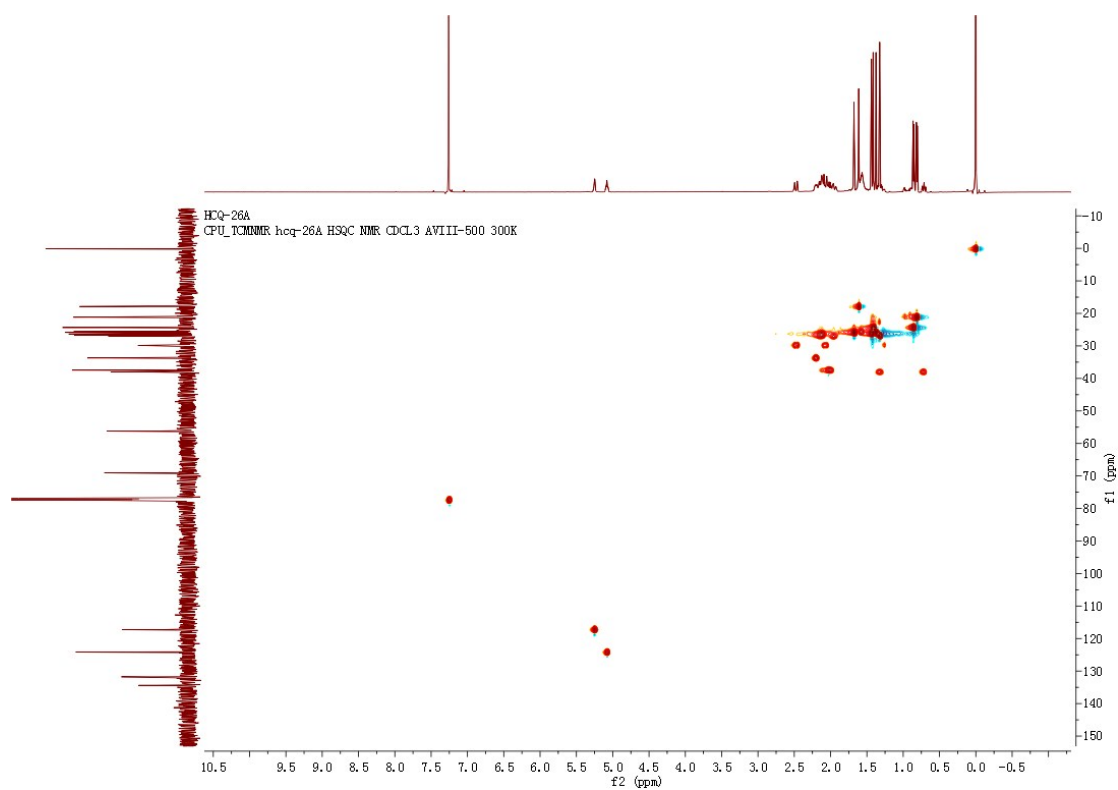

Figure S4.3 HSQC spectrum of compound **4** in  $\text{CDCl}_3$

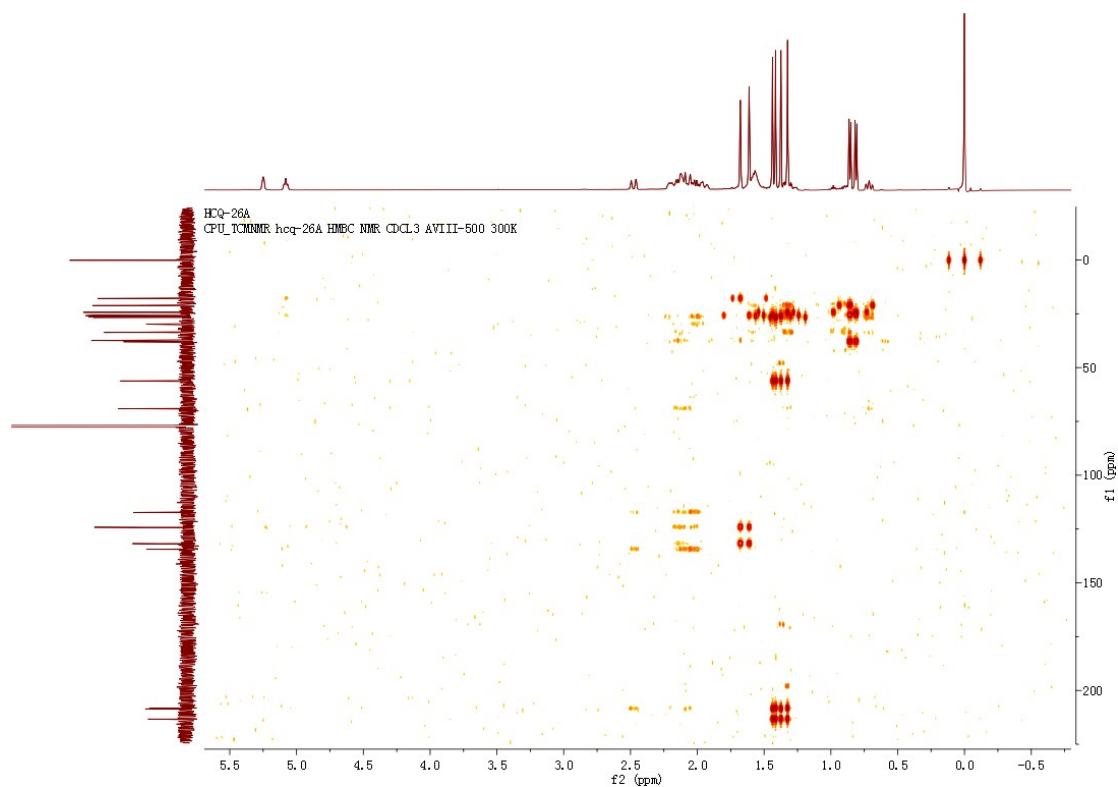

Figure S4.4 HMBC spectrum of compound **4** in  $\text{CDCl}_3$

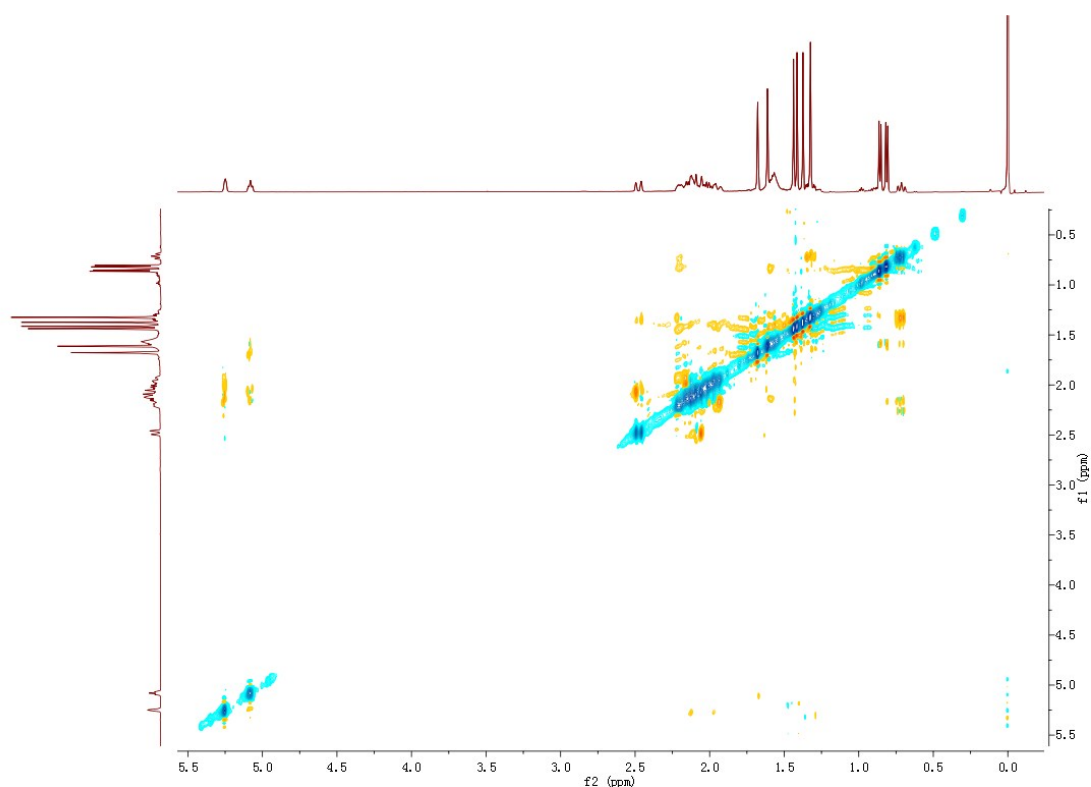

Figure S4.5 ROESY spectrum of compound **4** in  $\text{CDCl}_3$

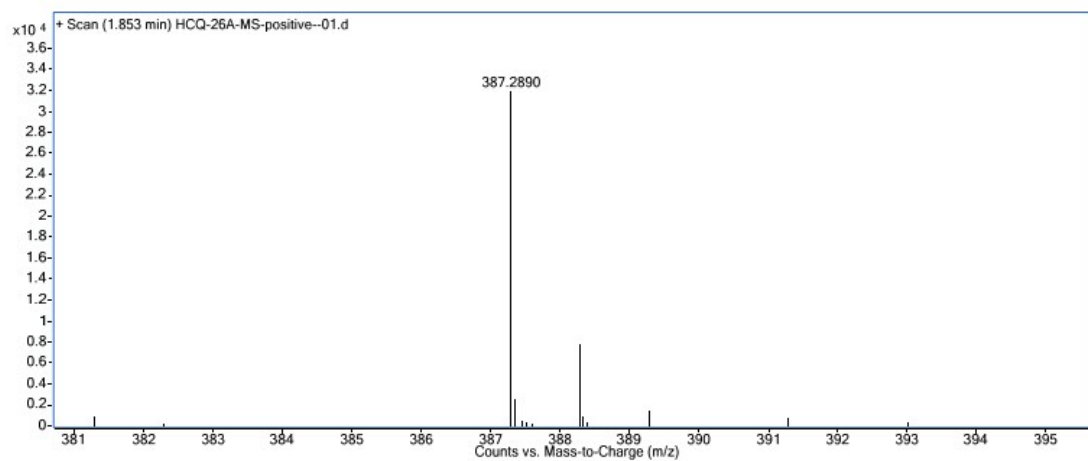

#### Elemental Composition Calculator

| Target m/z:                            | 387.289                                          | Result type: | Positive ions | Species: | $[\text{M}+\text{H}]^+$ |
|----------------------------------------|--------------------------------------------------|--------------|---------------|----------|-------------------------|
| Elements:                              | C (0-80); H (0-120); O (0-30); N(0-10); Na (0-5) |              |               |          |                         |
| Ion Formula                            | Calculated m/z                                   |              | PPM Error     |          |                         |
| $\text{C}_{25}\text{H}_{39}\text{O}_3$ | 387.2894                                         |              | 0.9           |          |                         |

Figure S4.6 HRESIMS spectrum of compound **4**

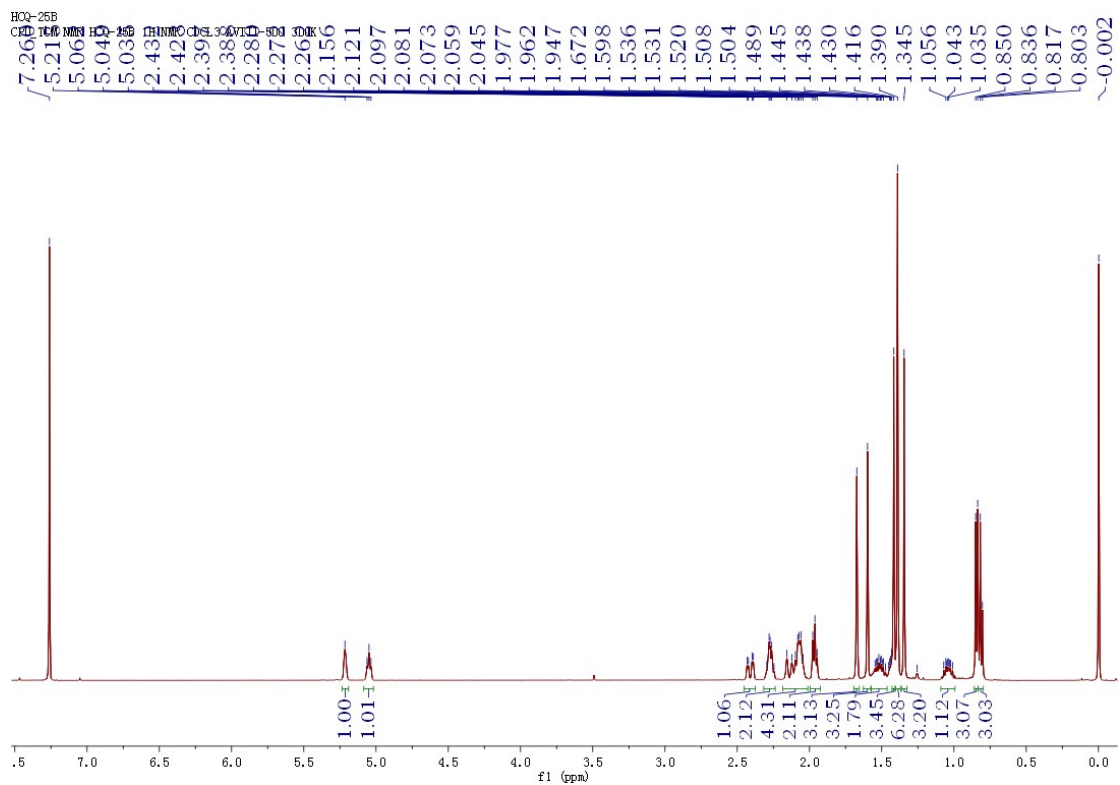

Figure S5.1  $^1\text{H}$  NMR spectrum of compound **5** in  $\text{CDCl}_3$

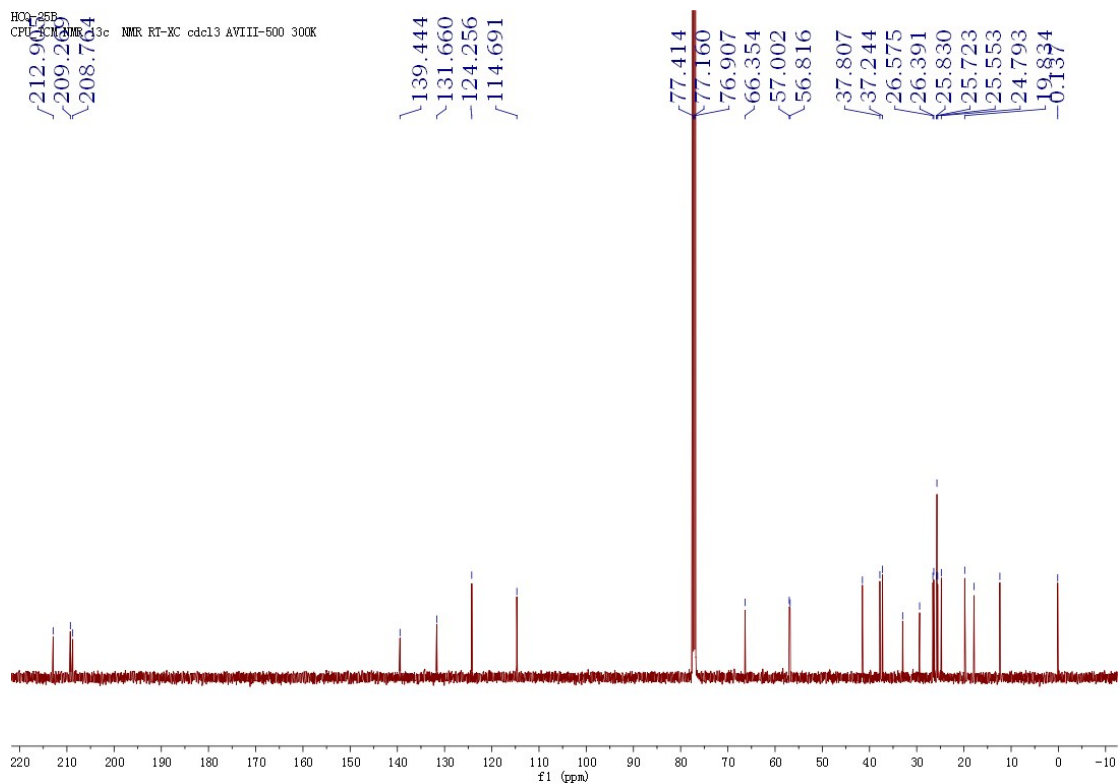

Figure S5.2  $^{13}\text{C}$  NMR spectrum of compound **5** in  $\text{CDCl}_3$



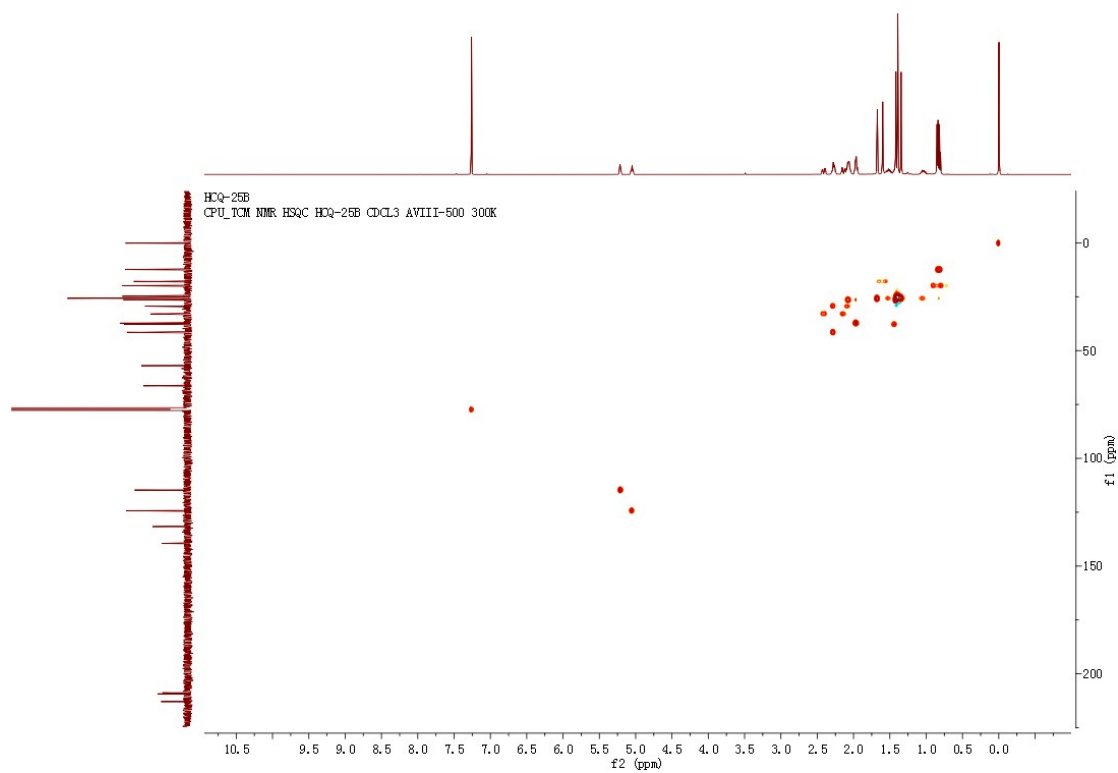

Figure S5.3 HSQC spectrum of compound **5** in CDCl<sub>3</sub>

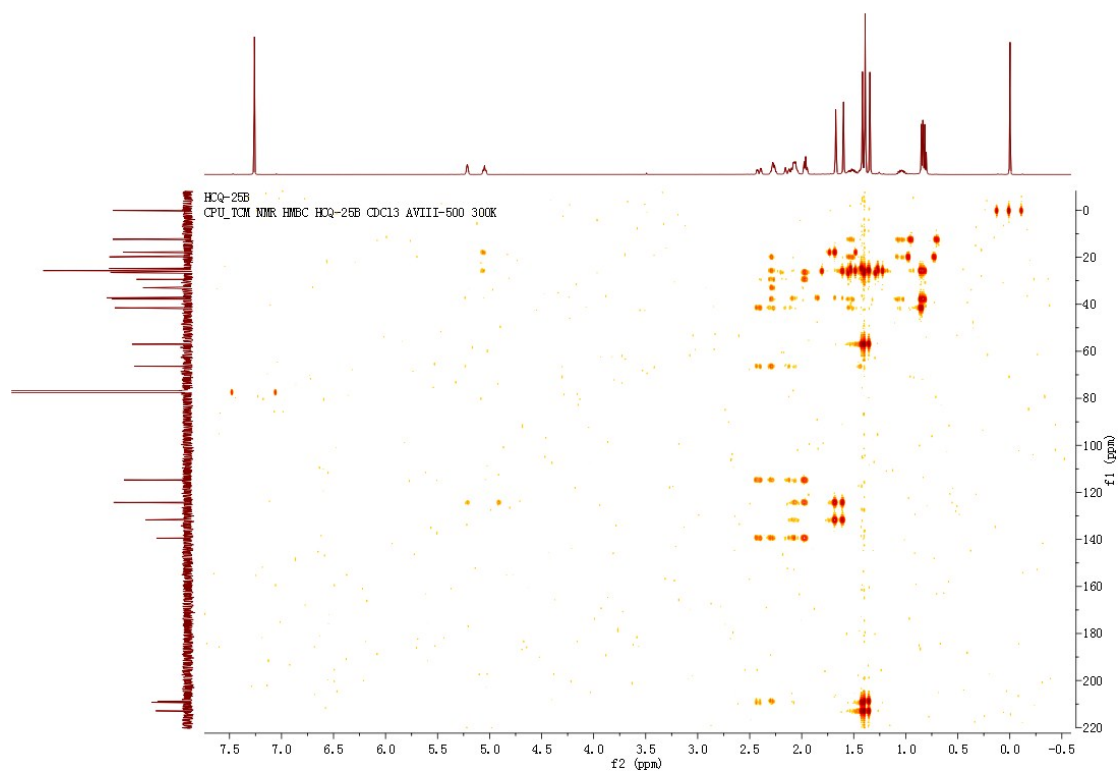

Figure S5.4 HMBC spectrum of compound **5** in CDCl<sub>3</sub>

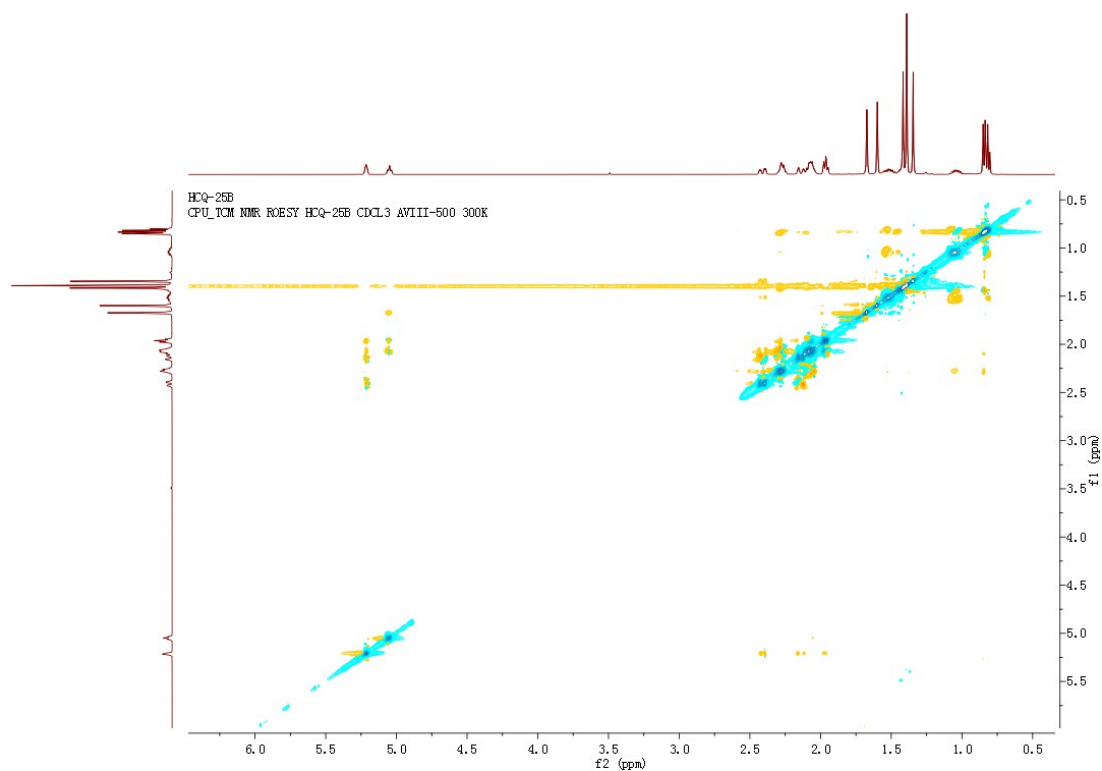

Figure S5.5 ROESY spectrum of compound **5** in CDCl<sub>3</sub>

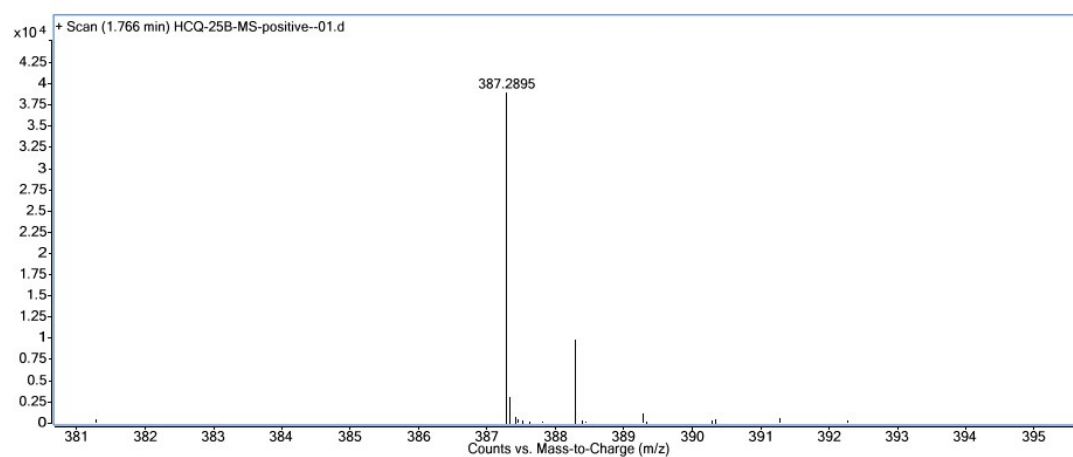

#### Elemental Composition Calculator

| Target m/z:                                    | 387.2895                                         | Result type: | Positive ions | Species: | [M+H] <sup>+</sup> |
|------------------------------------------------|--------------------------------------------------|--------------|---------------|----------|--------------------|
| Elements:                                      | C (0-80); H (0-120); O (0-30); N(0-10); Na (0-5) |              |               |          |                    |
| Ion Formula                                    | Calculated m/z                                   |              | PPM Error     |          |                    |
| C <sub>25</sub> H <sub>39</sub> O <sub>3</sub> | 387.2894                                         |              | -0.23         |          |                    |

Figure S5.6 HRESIMS spectrum of compound **5**

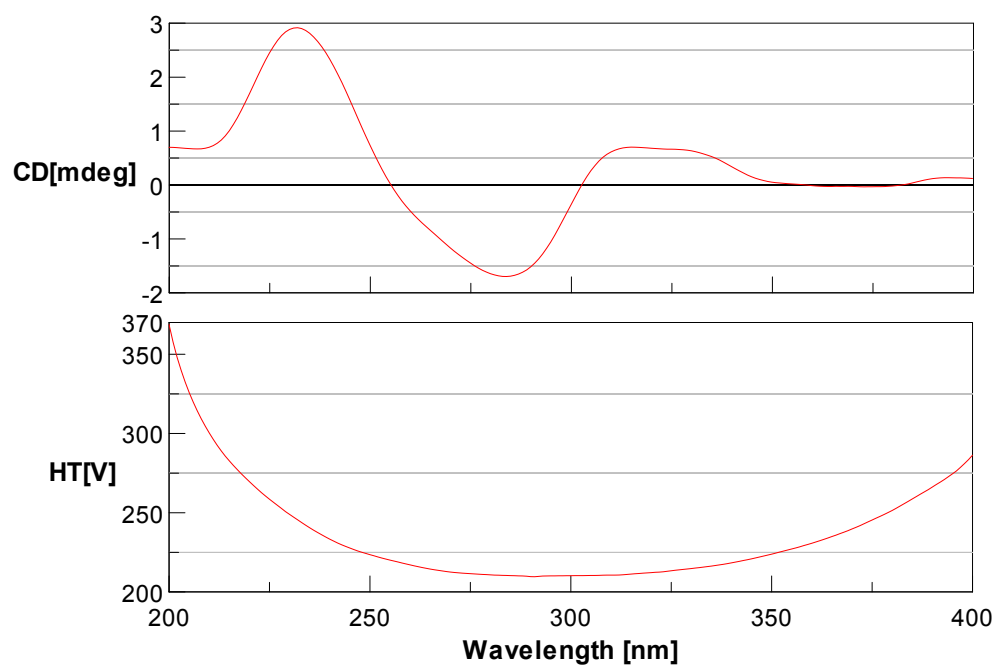

Figure S5.7 CD spectrum of compound **5**

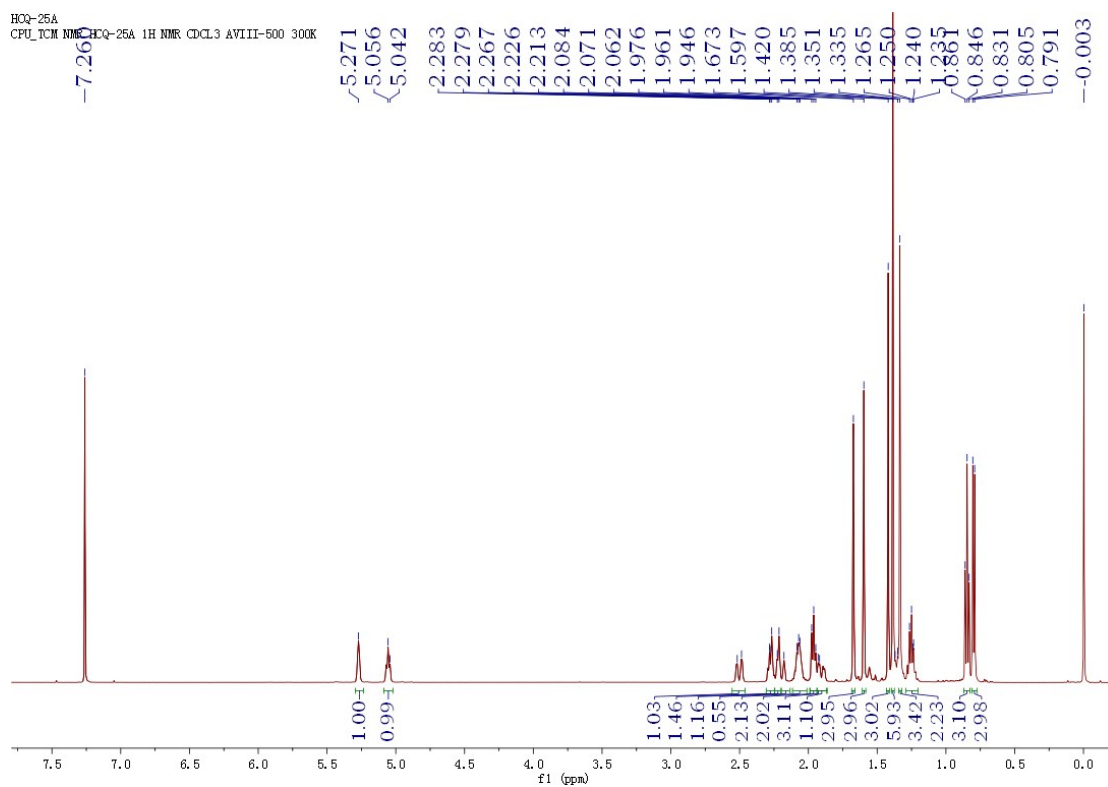

Figure S6.1  $^1\text{H}$  NMR spectrum of compound **6** in  $\text{CDCl}_3$

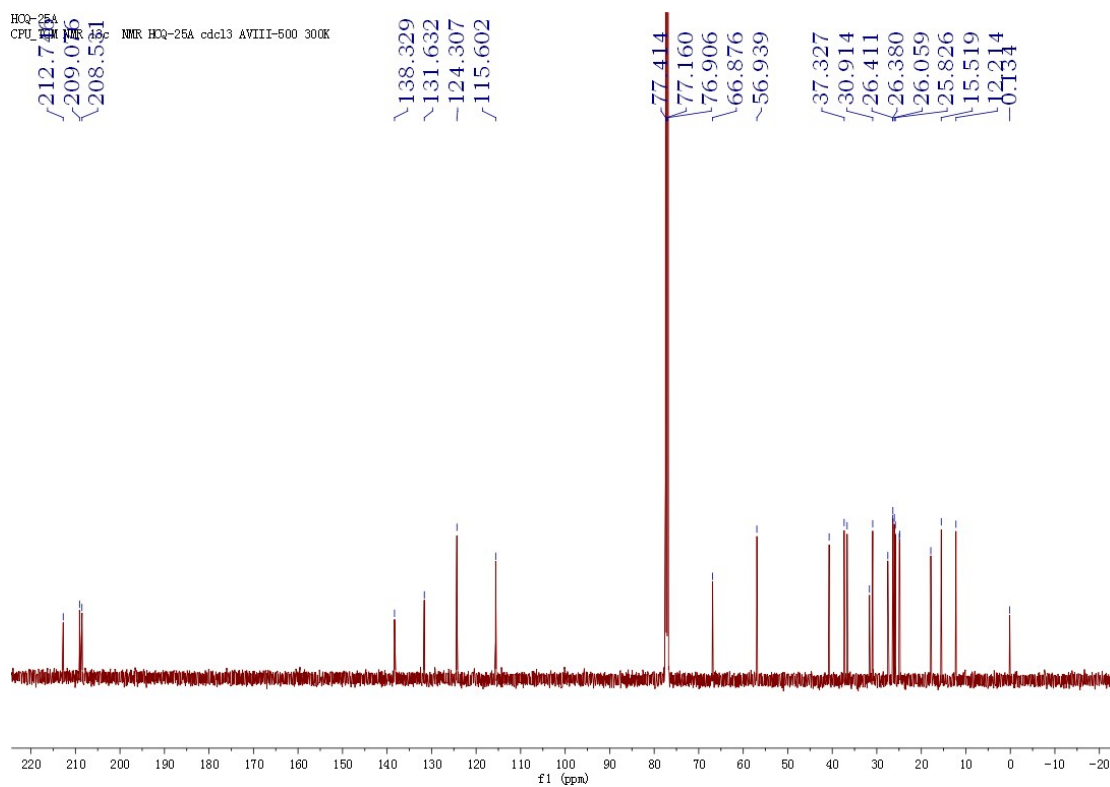

Figure S6.2  $^{13}\text{C}$  NMR spectrum of compound **6** in  $\text{CDCl}_3$

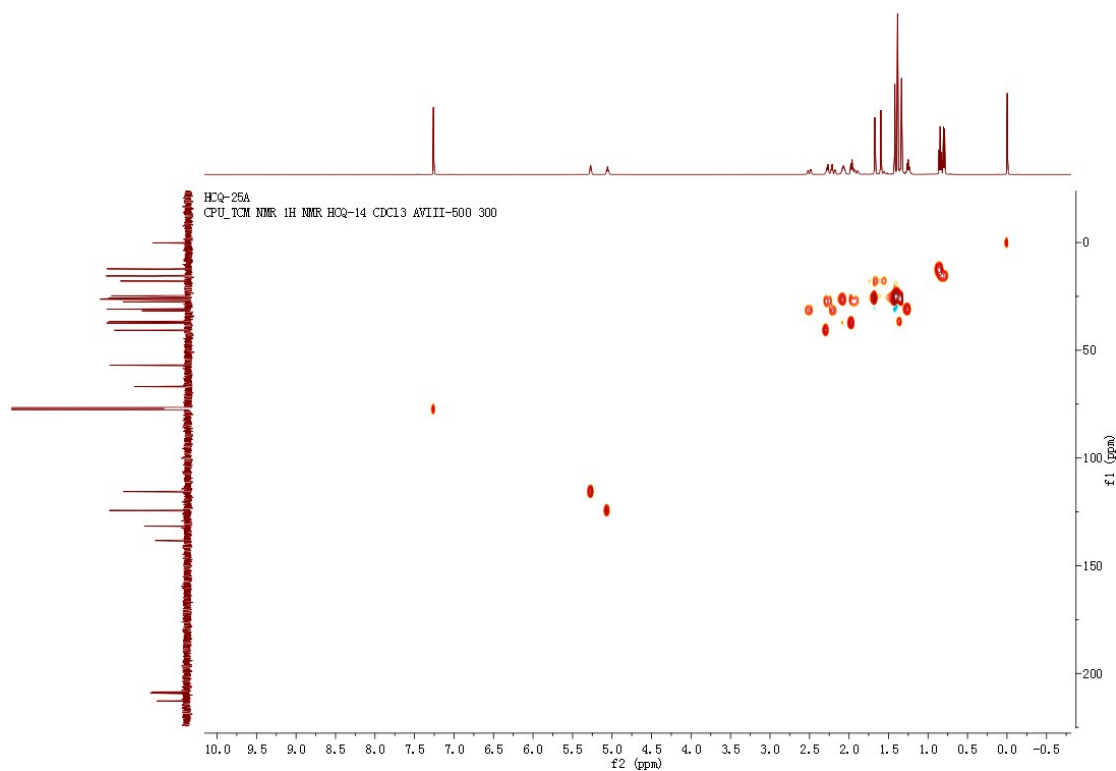

Figure S6.3 HSQC spectrum of compound **6** in  $\text{CDCl}_3$

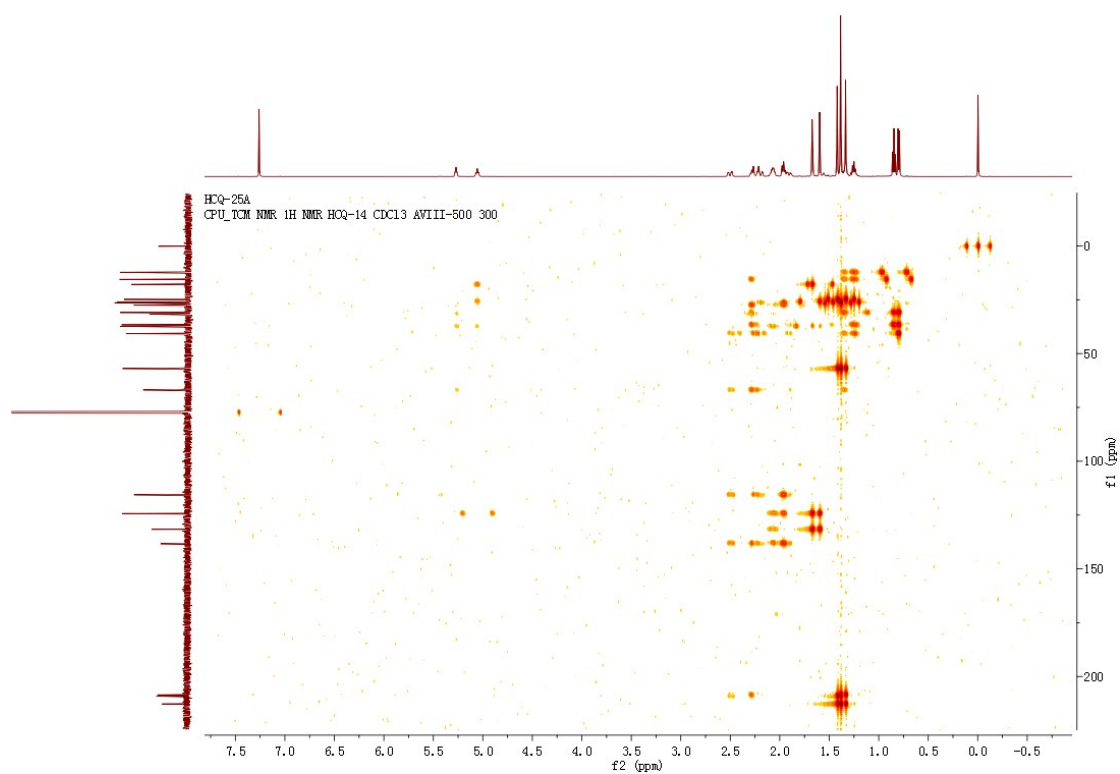

Figure S6.4 HMBC spectrum of compound **6** in  $\text{CDCl}_3$

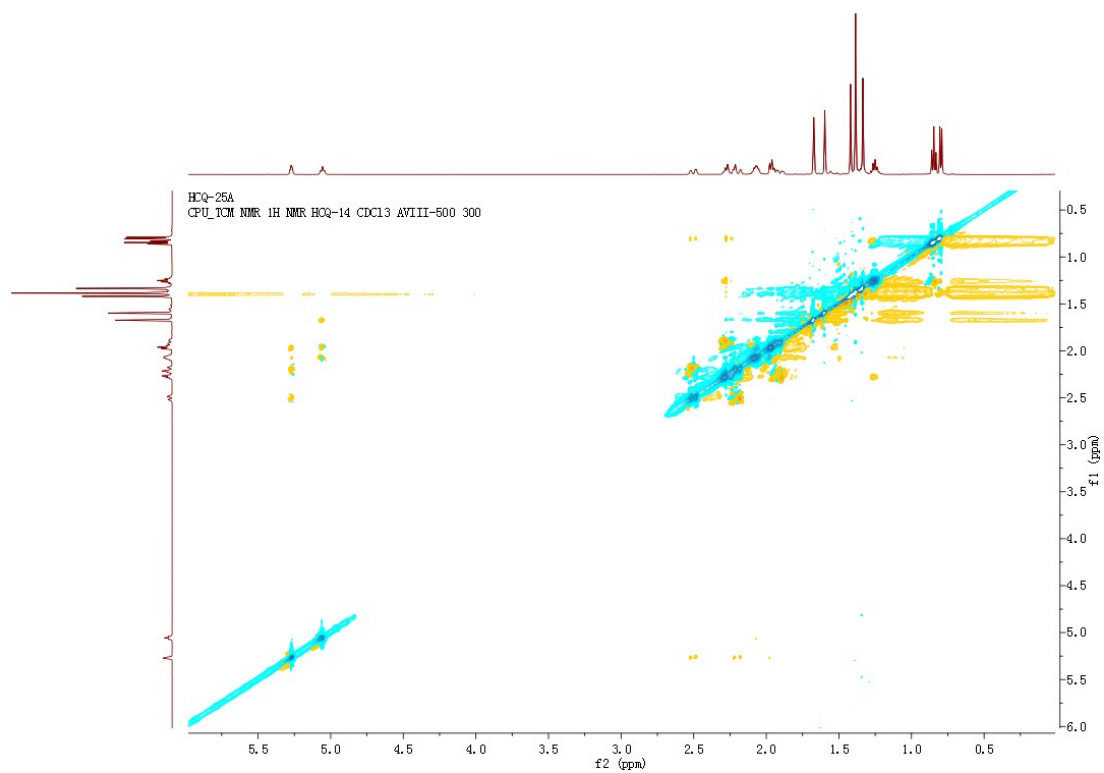

Figure S6.5 ROESY spectrum of compound **6** in  $\text{CDCl}_3$

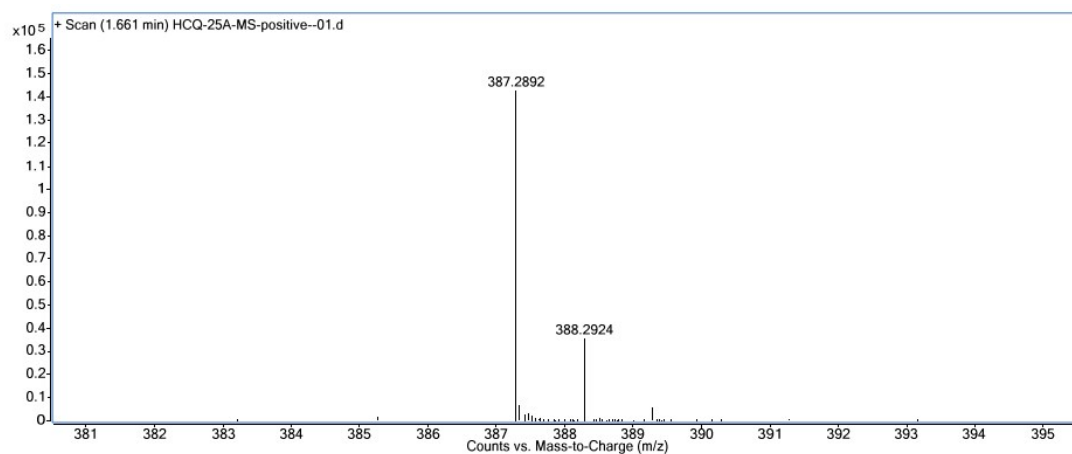

### Elemental Composition Calculator

| Target m/z:                                    | 387.2892                                         | Result type: | Positive ions | Species: | [M+H] <sup>+</sup> |
|------------------------------------------------|--------------------------------------------------|--------------|---------------|----------|--------------------|
| Elements:                                      | C (0-80); H (0-120); O (0-30); N(0-10); Na (0-5) |              |               |          |                    |
| Ion Formula                                    | Calculated m/z                                   |              | PPM Error     |          |                    |
| C <sub>25</sub> H <sub>39</sub> O <sub>3</sub> | 387.2894                                         |              | 0.43          |          |                    |

Figure S6.6 HRESIMS spectrum of compound **6**

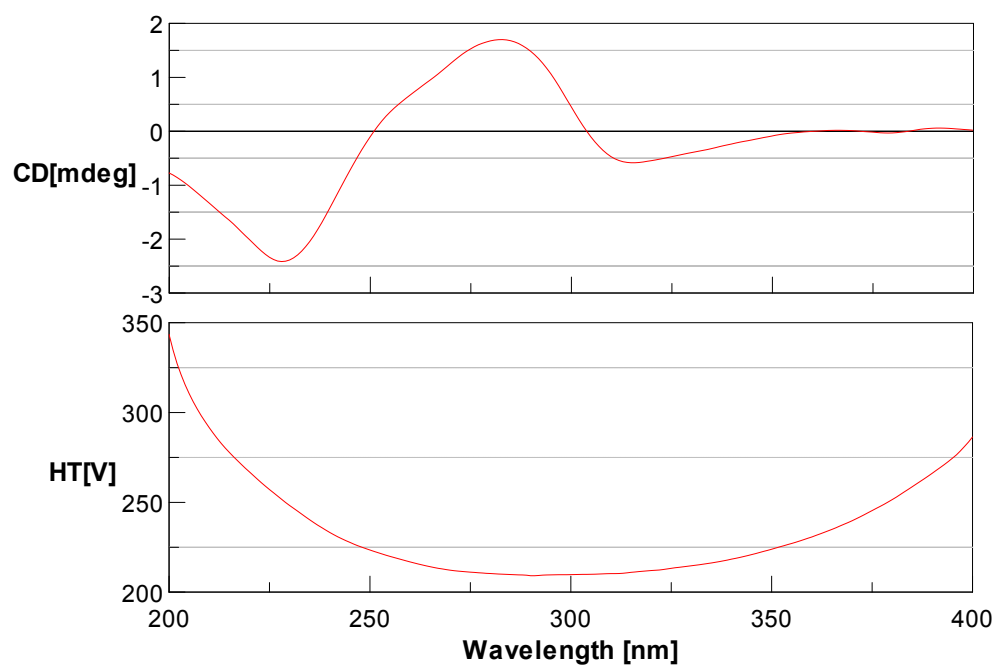

Figure S6.7 CD spectrum of compound **6**
